# Supplementary material
Source: Springer Nature journal article supplement (https://www.springermedizin.de/resource/supplementary/12884_2013_928_MOESM1_ESM.pdf/9459242)
Supplement: MOESM1 [file 9459242]

Recognised need for care? **No** → e.g. unaware of infection [3]

Yes

Requested care? **No** → e.g. too ashamed [7];  
told to wait until morning [8]

Yes

Received emergency care?

**No** →

Delay in request being received  
e.g. no phone [1,3,4,6];  
had to walk [1,3,4,6,7];  
slow travel in wet season [4].

Delay in reaching care  
e.g. midwife at another birth [6];  
ambulance broke down [5].

Received effective care?

**No** →

e.g. prior condition &  
died in hospital [2]

*First delay*

*- in deciding to seek care*

*Second delay*

*- in reaching adequate care*

*Third delay*

*- in receiving adequate care*
